# Supplementary material
Source: PubMed Central journal article supplement (PMC6599645)
Supplement: NIHMS1037469-supplement-Supplemental_information.pdf [file NIHMS1037469-supplement-Supplemental_information.pdf]

## Supporting Information for:

### Assessment of metabolic changes in *Mycobacterium smegmatis* wild type and *alr* mutant strains: evidence for a new pathway of D-alanine biosynthesis.

Darrell D. Marshall,<sup>1,†</sup> Steven Halouska,<sup>1,†</sup> Denise K. Zinniel,<sup>2</sup> Robert J. Fenton,<sup>2</sup> Katie Kenealy<sup>2</sup>, Harpreet K. Chahal,<sup>2</sup> Govardhan Rathnaiah,<sup>2</sup> Raúl G. Barletta,<sup>2,3\*</sup> and Robert Powers,<sup>1,3\*</sup>

<sup>1</sup>*Department of Chemistry, University of Nebraska-Lincoln, Lincoln, NE 68588-0304*

<sup>2</sup>*School of Veterinary Medicine and Biomedical Science, University of Nebraska–Lincoln, Lincoln, NE 68583-0905*

<sup>3</sup>*Center for Redox Biology, University of Nebraska-Lincoln, Lincoln, NE 68588-0662*

#### TABLE OF CONTENTS

**Table S1.** Proteins exhibiting a significant change in expression levels between TAM23 and mc<sup>2</sup>155 cells cultured in media without D-alanine.

**Figure S1.** Representative examples of 1D <sup>1</sup>H NMR spectra of *M. smegmatis* metabolite extracts.

**Figure S2.** OPLS-DA model generated from the 1D <sup>1</sup>H NMR spectra obtained from *M. smegmatis* metabolite extracts.

**Figure S3.** Overlay of 2D <sup>1</sup>H-<sup>13</sup>C HSQC spectra generated from *M. smegmatis* metabolite extracts.

**Table S1:** Proteins exhibiting a significant change in expression levels between TAM23 and mc<sup>2</sup>155 cells cultured in media without D-alanine.

| #                                | Identified Proteins                                                                                 | Accession Number <sup>a</sup> | Molecular Wt. | Normalized Spectral Count |       |
|----------------------------------|-----------------------------------------------------------------------------------------------------|-------------------------------|---------------|---------------------------|-------|
|                                  |                                                                                                     |                               |               | mc <sup>2</sup> 155       | TAM23 |
| <b>TAM23</b>                     |                                                                                                     |                               |               |                           |       |
| 68                               | alanine dehydrogenase [Mycobacterium smegmatis str. MC2 155]                                        | gi 118170099                  | 39 kDa        | 0                         | 28    |
| 99                               | adenosine deaminase [Mycobacterium smegmatis str. MC2 155]                                          | gi 118169012                  | 40 kDa        | 0                         | 31    |
| 120                              | DeoR-family protein transcriptional regulator [Mycobacterium smegmatis str. MC2 155]                | gi 118171152                  | 35 kDa        | 0.92                      | 12    |
| 42                               | alcohol dehydrogenase [Mycobacterium smegmatis str. MC2 155]                                        | gi 118171987                  | 38 kDa        | 0                         | 86    |
| 55                               | regulatory protein, AsnC/Lrp [Mycobacterium smegmatis str. MC2 155]                                 | gi 118173708                  | 32 kDa        | 0                         | 18    |
| 56                               | adenosylmethionine--8-amino-7-oxononoate transaminase [Mycobacterium smegmatis str. MC2 155]        | gi 118175053                  | 49 kDa        | 0                         | 75    |
| 75                               | putative xylulose kinase [Mycobacterium smegmatis str. MC2 155]                                     | gi 118173132                  | 43 kDa        | 0                         | 15    |
| 157                              | alcohol dehydrogenase [Mycobacterium smegmatis str. MC2 155]                                        | gi 118171143                  | 34 kDa        | 1                         | 32    |
| 190                              | alcohol dehydrogenase, class IV [Mycobacterium smegmatis str. MC2 155]                              | gi 118172253                  | 40 kDa        | 2                         | 25    |
| 197                              | cytochrome P450 monooxygenase [Mycobacterium smegmatis str. MC2 155]                                | gi 118174179                  | 50 kDa        | 2                         | 15    |
| 208                              | phytoene dehydrogenase [Mycobacterium smegmatis str. MC2 155]                                       | gi 118170654                  | 55 kDa        | 2                         | 10    |
| 245                              | eptc-inducible aldehyde dehydrogenase [Mycobacterium smegmatis str. MC2 155]                        | gi 118168881                  | 56 kDa        | 5                         | 17    |
| 299                              | alcohol dehydrogenase, iron-containing [Mycobacterium smegmatis str. MC2 155]                       | gi 118172943                  | 46 kDa        | 0                         | 17    |
| 506                              | putative acyl-CoA dehydrogenase [Mycobacterium smegmatis str. MC2 155]                              | gi 118171098                  | 44 kDa        | 0                         | 12    |
| <b>mc<sup>2</sup>155</b>         |                                                                                                     |                               |               |                           |       |
| 85                               | DNA-directed RNA polymerase, beta' subunit [Mycobacterium smegmatis str. MC2 155]                   | gi 118171055                  | 147 kDa       | 18                        | 1     |
| 100                              | ferredoxin-dependent glutamate synthase 1 [Mycobacterium smegmatis str. MC2 155]                    | gi 118169347                  | 167 kDa       | 23                        | 7     |
| 195                              | tRNA (5-methylaminomethyl-2-thiouridylate)-methyltransferase [Mycobacterium smegmatis str. MC2 155] | gi 118174880                  | 38 kDa        | 16                        | 1     |
| 199                              | ribosomal protein L20 [Mycobacterium smegmatis str. MC2 155]                                        | gi 118172082                  | 14 kDa        | 21                        | 1     |
| 262                              | putative thiosulfate sulfurtransferase [Mycobacterium smegmatis str. MC2 155]                       | gi 118173744                  | 33 kDa        | 16                        | 0     |
| 275                              | CAIB/BAIF family protein [Mycobacterium smegmatis str. MC2 155]                                     | gi 118173815                  | 43 kDa        | 11                        | 0     |
| 469                              | 50S ribosomal protein L22 [Mycobacterium smegmatis str. MC2 155]                                    | gi 118170402                  | 16 kDa        | 11                        | 0     |
| <b>mc<sup>2</sup>155 + TAM23</b> |                                                                                                     |                               |               |                           |       |
| 73                               | methylmalonate-semialdehyde dehydrogenase [Mycobacterium smegmatis str. MC2 155]                    | gi 118171123                  | 52 kDa        | 14                        | 42    |

<sup>a</sup>GenBank genInfo identifier

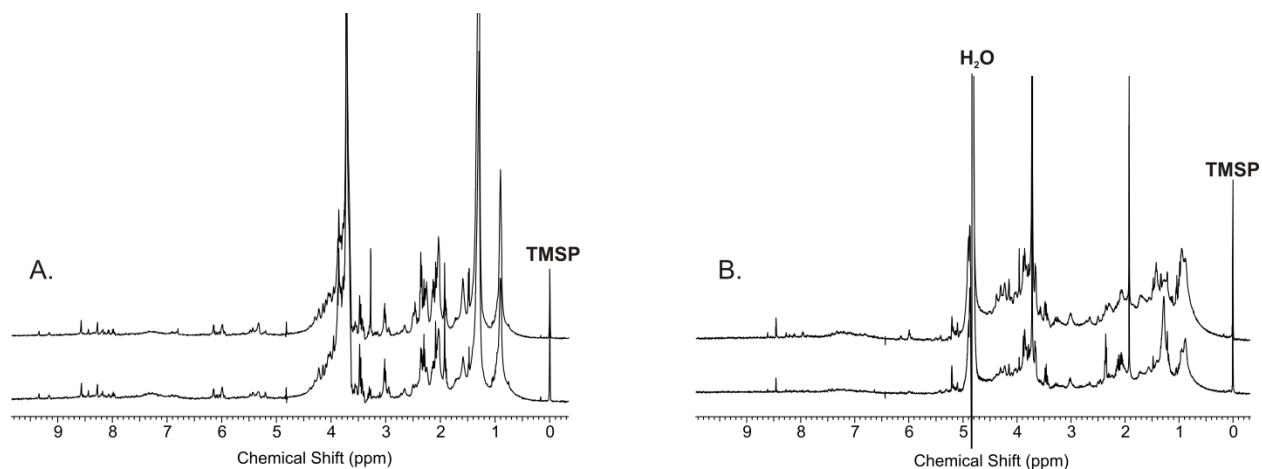

**Figure S1. Representative examples of 1D  $^1\text{H}$  NMR spectra of *M. smegmatis* metabolite extracts.** 1D  $^1\text{H}$  NMR spectra of metabolites extracted from (*top*) *alr* insertion mutant TAM23 compared to (*bottom*) wild type strain mc<sup>2</sup>155 (A) with and (B) without culture media supplemented with D-alanine.

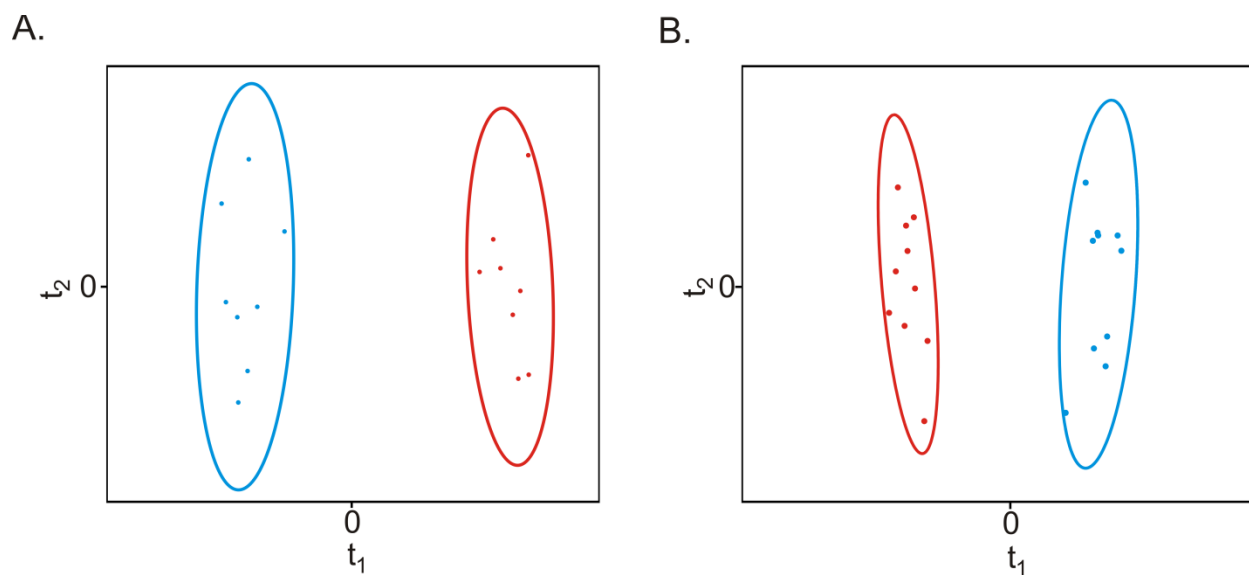

**Figure S2. OPLS-DA model generated from the 1D  $^1\text{H}$  NMR spectra obtained from *M. smegmatis* metabolite extracts. OPLS-DA scores plot comparing the mc<sup>2</sup>155 (blue) and TAM23 (red) metabolomes (A) without or (B) with media supplemented with D-alanine.**

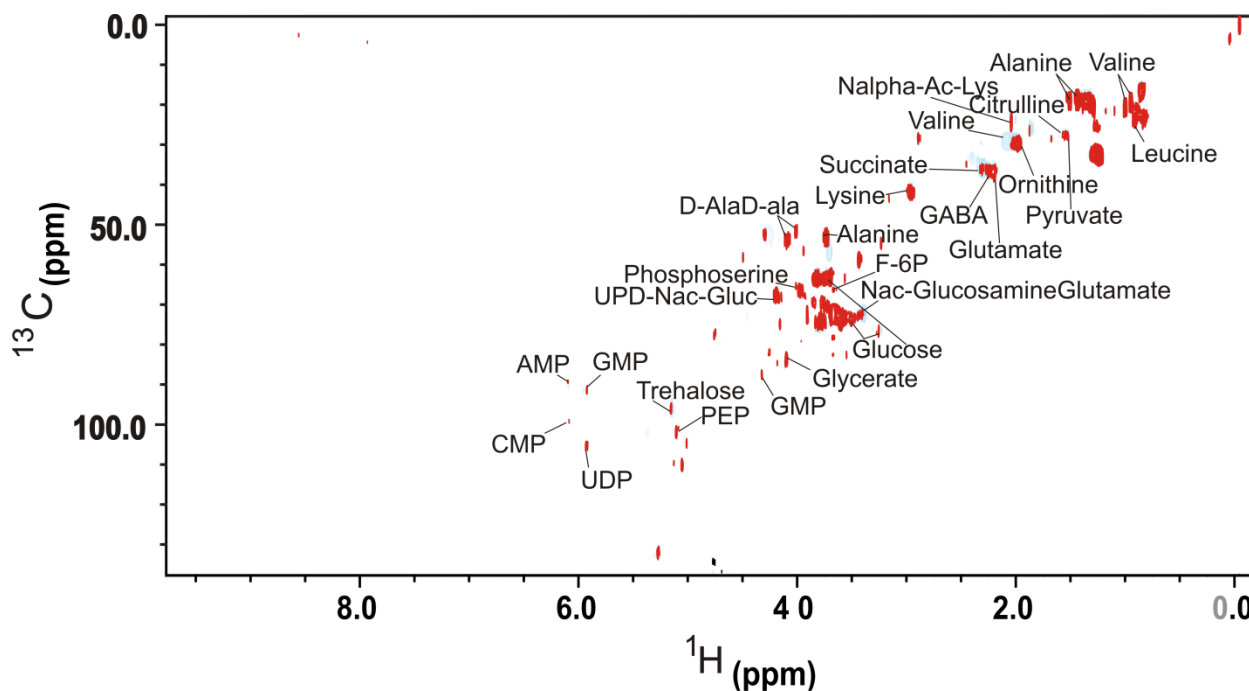

**Figure S3. Overlay of 2D  $^1\text{H}$ - $^{13}\text{C}$  HSQC<sub>0</sub> spectra from *M. smegmatis* metabolite extracts.**

Metabolites were extracted from wild type strain *mc*<sup>2</sup>155 (blue) and *alr* insertion mutant TAM23 (red), which were grown in MADC supplemented with 100  $\mu\text{M}$  of [ $^{13}\text{C}_2$ ]-D-alanine. All of the labeled metabolites are derived from [ $^{13}\text{C}_2$ ]-D-alanine and the absolute concentrations derived from the HSQC<sub>0</sub> experiment are summarized in Fig. 3.
